# Supplementary material for: Comparing the Efficacy of Cancer Therapies between Subgroups in Basket Trials
Source: PubMed Central journal article supplement — Cell Syst. Author manuscript; Available in PMC 2021 Apr 6. (PMC8022348; doi:10.1016/j.cels.2020.09.003), 2020-11-18
Supplement: NIHMS1679904-supplement-1.pdf [file NIHMS1679904-supplement-1.pdf]

**Cell Systems, Volume 11**

**Supplemental Information**

**Comparing the Efficacy of Cancer Therapies  
between Subgroups in Basket Trials**

**Adam C. Palmer, Deborah Plana, and Peter K. Sorger**

**Supplemental Information**

**Comparing the efficacy of cancer therapies between subgroups in basket trials**

**Adam C. Palmer\*, Deborah Plana\*, Peter K. Sorger**

**\*These authors contributed equally**

**Inventory of Supplemental Information**

- 1. Supplementary Table S1. Related to Figure 2.**
- 2. Supplementary Table S2. Related to Figure 3.**
- 3. Supplementary Figure S1. Related to Figure 4.**
- 4. Supplementary Figure S2. Related to Figure 5.**

A.

| Mutation Type<br>(n= number of patients per subgroup) | Test for larger benefit in tumor volume |                                                    | Conclusion based on 25% False Discovery Rate |
|-------------------------------------------------------|-----------------------------------------|----------------------------------------------------|----------------------------------------------|
|                                                       | p-value                                 | Benjamini-Hochberg critical value for 1-sided test |                                              |
| L755 Hotspot (n =13)                                  | 0.031                                   | 0.025                                              | N.S.                                         |
| Exon20 Insertion Hotspot (n= 28)                      | 0.162                                   | 0.050                                              | N.S.                                         |
| S310 Hotspot (n= 30)                                  | 0.267                                   | 0.075                                              | N.S.                                         |
| V777 Hotspot (n= 15)                                  | 0.276                                   | 0.100                                              | N.S.                                         |
| ERBB3 Nonhotspot (n= 4)                               | 0.421                                   | 0.125                                              | N.S.                                         |
| Other Hotspot (n= 9)                                  | 0.529                                   | 0.150                                              | N.S.                                         |
| PKD Nonhotspot (n= 12)                                | 0.651                                   | 0.175                                              | N.S.                                         |
| ERBB3 Hotspot (n= 12)                                 | 0.931                                   | 0.200                                              | N.S.                                         |
| PKD Hotspot (n= 14)                                   | 0.950                                   | 0.225                                              | N.S.                                         |
| Other Nonhotspot (n= 4)                               | 0.954                                   | 0.250                                              | N.S.                                         |

B.

| Mutation Type<br>(n= number of patients per subgroup) | Test for larger benefit in hazard ratio for progression |                                                    | Conclusion based on 25% False Discovery Rate |
|-------------------------------------------------------|---------------------------------------------------------|----------------------------------------------------|----------------------------------------------|
|                                                       | p-value                                                 | Benjamini-Hochberg critical value for 1-sided test |                                              |
| <b>Exon20 Insertion Hotspot (n= 26)</b>               | <b>0.011</b>                                            | <b>0.025</b>                                       | <b>Larger Benefit</b>                        |
| S310 Hotspot (n= 30)                                  | 0.094                                                   | 0.050                                              | N.S.                                         |
| Other Hotspot (n= 8)                                  | 0.274                                                   | 0.075                                              | N.S.                                         |
| L755 Hotspot (n= 13)                                  | 0.456                                                   | 0.100                                              | N.S.                                         |
| PKD Hotspot (n= 14)                                   | 0.499                                                   | 0.125                                              | N.S.                                         |
| PKD Nonhotspot (n= 11)                                | 0.759                                                   | 0.150                                              | N.S.                                         |
| V777 Hotspot (n= 15)                                  | 0.944                                                   | 0.175                                              | N.S.                                         |
| ERBB3 Nonhotspot (n= 4)                               | 0.962                                                   | 0.200                                              | N.S.                                         |
| ERBB3 Hotspot (n= 12)                                 | 0.970                                                   | 0.225                                              | N.S.                                         |
| Other Nonhotspot (n= 4)                               | 0.985                                                   | 0.250                                              | N.S.                                         |

Supplementary Table S1. Benjamini-Hochberg critical values for analysis of neratinib tumor volume responses (A) and hazard ratios for progression (B) by specific mutation type. Related to Figure 2.

A.

| NTRK paralog<br>(n= number of patients<br>per subgroup) | Test for larger benefit in<br>tumor volume |                                                              | Test for smaller benefit in<br>tumor volume |                                                              | Conclusion<br>based on 25% False<br>Discovery Rate |
|---------------------------------------------------------|--------------------------------------------|--------------------------------------------------------------|---------------------------------------------|--------------------------------------------------------------|----------------------------------------------------|
|                                                         | p-value                                    | Benjamini-<br>Hochberg<br>critical value<br>for 2-sided test | p-value                                     | Benjamini-<br>Hochberg<br>critical value<br>for 2-sided test |                                                    |
| NTRK3 (n= 28)                                           | 0.147                                      | 0.063                                                        | 0.854                                       | 0.125                                                        | N.S.                                               |
| NTRK1 (n= 24)                                           | 0.804                                      | 0.125                                                        | 0.197                                       | 0.063                                                        | N.S.                                               |

B.

| NTRK fusion partner<br>(n= number of patients<br>per subgroup) | Test for larger benefit in<br>tumor volume |                                                              | Test for smaller benefit in<br>tumor volume |                                                              | Conclusion<br>based on 25% False<br>Discovery Rate |
|----------------------------------------------------------------|--------------------------------------------|--------------------------------------------------------------|---------------------------------------------|--------------------------------------------------------------|----------------------------------------------------|
|                                                                | p-value                                    | Benjamini-<br>Hochberg<br>critical value<br>for 2-sided test | p-value                                     | Benjamini-<br>Hochberg<br>critical value<br>for 2-sided test |                                                    |
| ETV6-NTRK3 (n= 27)                                             | 0.160                                      | 0.042                                                        | 0.840                                       | 0.125                                                        | N.S.                                               |
| TPM3-NTRK1 (n= 9)                                              | 0.757                                      | 0.083                                                        | 0.246                                       | 0.083                                                        | N.S.                                               |
| LMNA-NTRK1 (n= 5)                                              | 0.941                                      | 0.125                                                        | 0.059                                       | 0.042                                                        | N.S.                                               |

**Supplementary Table S2. Benjamini-Hochberg critical values for analysis of larotrectinib tumor volume responses by genomic status. Related to Figure 3.**

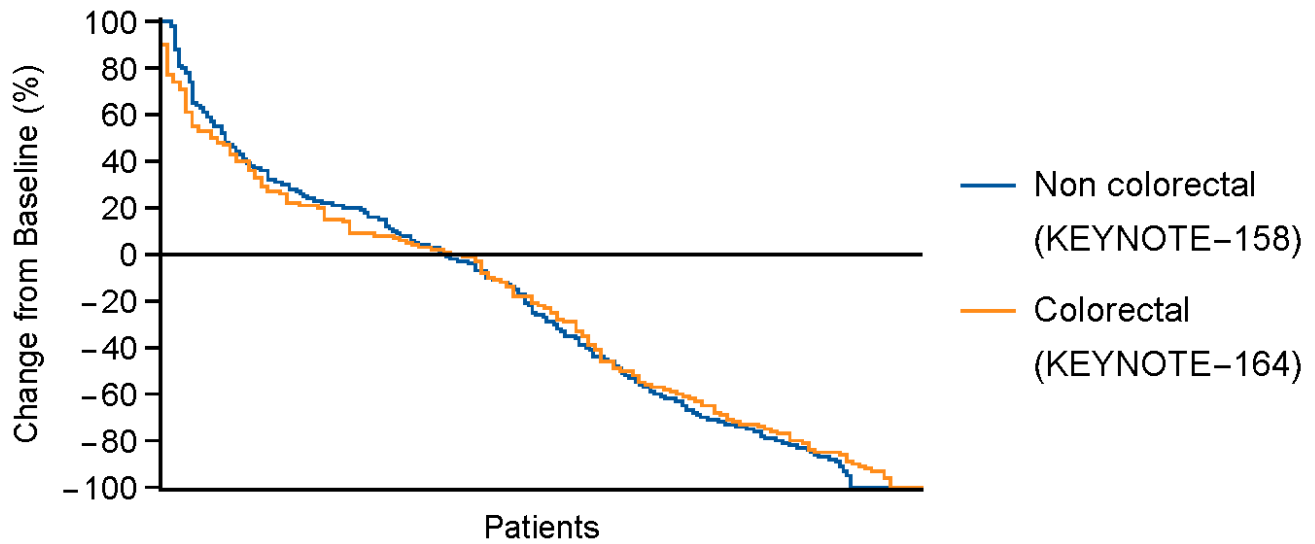

**Supplementary Figure S1. Comparison of tumor volume changes in response to pembrolizumab in colorectal and non-colorectal cancers. Related to Figure 4.** Patient tumor volume change data was extracted from the KEYNOTE-158 (n=233) and KEYNOTE-164 (n=124) trials. Both trials tested the PD-L1 inhibitor, pembrolizumab, in colorectal and noncolorectal cancers.

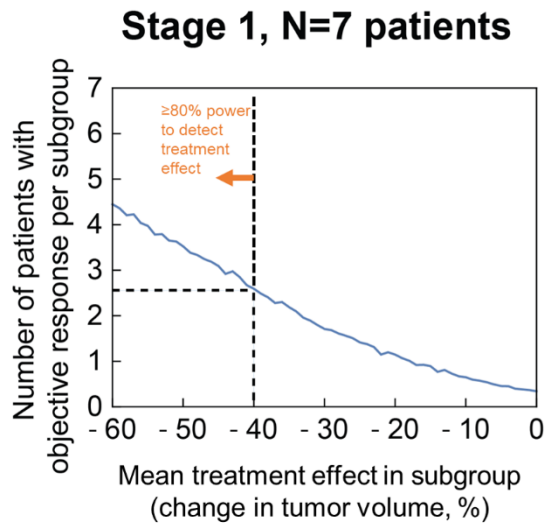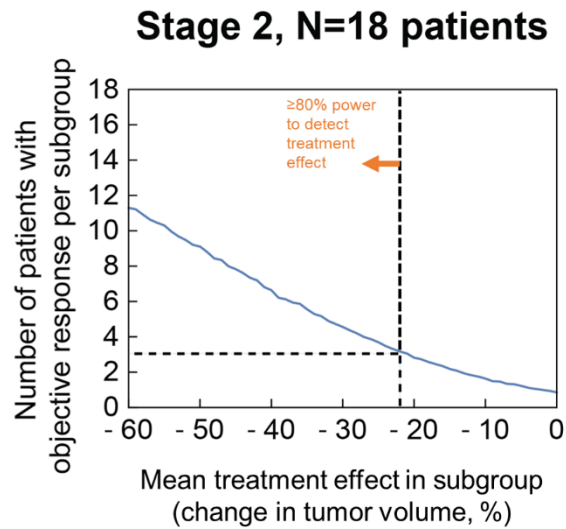

**Supplementary Figure S2. Number of responsive patients needed to achieve 80% power using a permutation test. Related to Figure 5.** Computational simulation identifies number of patients with objective responses (greater than 30% decrease in tumor volume) in a subgroup, across different average treatment effects. Dotted lines indicate the number of responsive patients needed for 80% power in a permutation test (based on the simulation and tumor volume change values reported in Figure 5, row 2).
